# Supplementary material
Source: publisher figshare collection journal article supplement (https://acs.figshare.com/ndownloader/files/3749626)
Supplement: Supplementary file 1 [file 3749626]

_chemical_name_mineral ?alphaBi2O3_PAHT?
_cell_length_a 5.848361
_cell_length_b 8.168703
_cell_length_c 7.513331
_cell_angle_alpha 90
_cell_angle_beta 112.99207
_cell_angle_gamma 90
_cell_volume 330.423854
_symmetry_space_group_name_H-M P121/c1
loop_
	_symmetry_equiv_pos_as_xyz
	 'x, y, z '
	 '-x, y+1/2, -z+1/2 '
	 'x, -y+1/2, z+1/2 '
	 '-x, -y, -z '
loop_
_atom_site_label
_atom_site_type_symbol
_atom_site_symmetry_multiplicity
_atom_site_fract_x
_atom_site_fract_y
_atom_site_fract_z
_atom_site_occupancy
_atom_site_B_iso_or_equiv
Bi1 Bi+3   4 0.52464 0.18191 0.35844 1 0.69941
Bi2 Bi+3   4 0.04103 0.04228 0.77812 1 0.8313
O1 O-2   4 0.81495 0.29752 0.75057 1 0.9
O2 O-2   4 0.26129 0.04816 0.17392 1 1.2
O3 O-2   4 0.32859 0.01537 0.51327 1 0.8
